# Supplementary material for: Deficiency in cytosine DNA methylation leads to high chaperonin expression and tolerance to aminoglycosides in Vibrio cholerae
Source: PubMed Central journal article supplement (PMC8559950; doi:10.1371/journal.pgen.1009748), 2021-10-20
Supplement: pgen.1009748.s001.pdf [file pgen.1009748.s001.pdf]

**Table S1. Differentially regulated genes in  $\Delta vchM$  strain**

| Locus              | Name           | Annotation                                                                     | Fold change<br>$\Delta vchM/WT$ | p-value        |
|--------------------|----------------|--------------------------------------------------------------------------------|---------------------------------|----------------|
| <b>UPREGULATED</b> |                |                                                                                |                                 |                |
| <i>vca1028</i>     | <i>lamB</i>    | maltoporin                                                                     | 52,81                           | 0,0E+00        |
| <i>vca0707</i>     | <i>uhpC</i>    | MFS transporter                                                                | 8,76                            | 8,6E-06        |
| <i>vc1368</i>      |                | conserved hypothetical protein                                                 | 8,18                            | 0,0E+00        |
| <i>vca0819</i>     | <i>groES-2</i> | <b>chaperonin</b>                                                              | <b>6,78</b>                     | <b>0,0E+00</b> |
| <i>vca0200</i>     |                | putative ATPase                                                                | 6,10                            | 0,0E+00        |
| <i>vca0957</i>     | <i>glcB</i>    | putative Malate synthase                                                       | 5,97                            | 0,0E+00        |
| <i>vca0199</i>     |                | conserved hypothetical protein                                                 | 5,32                            | 5,2E-09        |
| <i>vca1027</i>     | <i>malM</i>    | putative Maltose operon periplasmic protein MalM                               | 4,14                            | 0,0E+00        |
| <i>vca0201</i>     |                | conserved hypothetical protein                                                 | 3,97                            | 3,4E-11        |
| <i>vca0946</i>     | <i>malk</i>    | Maltose/maltodextrin import ATP-binding protein malk                           | 3,91                            | 0,0E+00        |
| <i>vca0469</i>     | <i>higA2</i>   | plasmid stabilization system HigA protein (antitoxin of TA system HigB-HigA)   | 3,91                            | 0,0E+00        |
| <i>vca0468</i>     | <i>higB2</i>   | plasmid stabilization system HigB protein (toxin of TA system HigB-HigA)       | 3,90                            | 2,3E-10        |
| <i>vca0945</i>     | <i>malE</i>    | maltose ABC transporter periplasmic binding protein                            | 3,90                            | 0,0E+00        |
| <i>vc1819</i>      | <i>aldA</i>    | Aldehyde dehydrogenase                                                         | 3,84                            | 1,7E-12        |
| <i>vc1204</i>      | <i>hutG</i>    | putative Formimidoylglutamase HutG (histidine utilization)                     | 3,80                            | 2,2E-16        |
| <i>vc1203</i>      | <i>hutU</i>    | Urocanate hydratase (histidine utilization)                                    | 3,60                            | 0,0E+00        |
| <i>vca0820</i>     | <i>groEL-2</i> | <b>chaperonin</b>                                                              | <b>3,54</b>                     | <b>2,2E-16</b> |
| <i>vca0692</i>     | <i>secF</i>    | fragment of putative SecD/SecF/SecDF export membrane protein (part 2)          | 3,48                            | 3,2E-08        |
| <i>vc1809</i>      | <i>alpA</i>    | putative Prophage CP4-57 regulatory protein (AlpA)                             | 3,37                            | 1,8E-09        |
| <i>vc1205</i>      | <i>hutI</i>    | Imidazolonepropionase (histidine utilization)                                  | 3,24                            | 1,1E-11        |
| <i>vc1740</i>      | <i>fadE</i>    | acyl coenzyme A dehydrogenase                                                  | 3,22                            | 5,6E-15        |
| <i>vca0944</i>     | <i>malF</i>    | maltose ABC transporter membrane subunit MalF                                  | 3,18                            | 0,0E+00        |
| <i>vc1142</i>      | <i>cspD</i>    | Cold shock-like protein cspD                                                   | 2,88                            | 0,0E+00        |
| <i>vc2530</i>      | <i>hpf</i>     | putative ribosome hibernation promoting factor HPF/sigma 54 modulation protein | 2,83                            | 0,0E+00        |
| <i>vca0948</i>     | <i>yaeO</i>    | putative Rho-specific inhibitor of transcription termination (YaeO)            | 2,78                            | 0,0E+00        |
| <i>vca0998</i>     | <i>xenB</i>    | Xenobiotic reductase B                                                         | 2,73                            | 4,4E-06        |

|                |                |                                                                                               |      |         |
|----------------|----------------|-----------------------------------------------------------------------------------------------|------|---------|
| <b>vc0486</b>  | <i>srIR</i>    | putative Transcriptional regulator of sugar metabolism; DeoR family transcriptional regulator | 2,65 | 9,9E-14 |
| <b>vc1874</b>  |                | putative SpoVR family protein                                                                 | 2,64 | 0,0E+00 |
| <b>vc1202</b>  | <i>hutH</i>    | Histidine ammonia-lyase                                                                       | 2,61 | 0,0E+00 |
| <b>vc2265</b>  | <i>groES-1</i> | chaperonin                                                                                    | 2,60 | 0,0E+00 |
| <b>vc2615</b>  |                | conserved hypothetical protein                                                                | 2,55 | 4,6E-10 |
| <b>vc1678</b>  | <i>pspA</i>    | Phage shock protein A                                                                         | 2,48 | 4,6E-10 |
| <b>vc1183</b>  |                | putative 2OG-Fe dioxygenase                                                                   | 2,43 | 0,0E+00 |
| <b>vca0470</b> |                | putative Acetyltransferase                                                                    | 2,43 | 2,1E-08 |
| <b>vca0324</b> | <i>relB1</i>   | Plasmid stabilization system protein RelB (Anti Toxin of TA system RelB-RelE)                 | 2,43 | 1,1E-11 |
| <b>vca0886</b> | <i>kbl</i>     | glycine C-acetyltransferase                                                                   | 2,40 | 2,3E-08 |
| <b>vca0185</b> | <i>arfA</i>    | putative Stalled ribosome alternative rescue factor ArfA                                      | 2,39 | 3,0E-13 |
| <b>vca0958</b> |                | putative transcriptional regulator                                                            | 2,38 | 3,9E-10 |
| <b>vca0013</b> | <i>malP</i>    | maltodextrin phosphorylase                                                                    | 2,37 | 3,9E-11 |
| <b>vca0881</b> |                | conserved hypothetical protein                                                                | 2,36 | 1,1E-13 |
| <b>vca0551</b> |                | conserved hypothetical protein                                                                | 2,35 | 0,0E+00 |
| <b>vca0391</b> | <i>higB1</i>   | Plasmid stabilization system HigB protein (Toxin of TA system HigB-HigA)                      | 2,34 | 1,5E-10 |
| <b>vca0923</b> | <i>mlp37</i>   | chemoreceptor Mlp37                                                                           | 2,34 | 2,2E-12 |
| <b>vc2361</b>  | <i>grcA</i>    | Autonomous glycy radical cofactor                                                             | 2,30 | 0,0E+00 |
| <b>vca0392</b> | <i>higA1</i>   | Plasmid stabilization system HigA protein ( Antitoxin of TA system HigB-HigA)                 | 2,28 | 0,0E+00 |
| <b>vc0665</b>  | <i>vpsR</i>    | Fis family transcriptional regulator (sigma-54 dependent transcriptional regulator)           | 2,28 | 0,0E+00 |
| <b>vca0720</b> | <i>hnoX</i>    | Heme-Nitric Oxide/Oxygen Binding Protein (H-NOX)                                              | 2,27 | 5,1E-10 |
| <b>vc1433</b>  | <i>uspE</i>    | universal stress protein UspE                                                                 | 2,26 | 0,0E+00 |
| <b>vc1248</b>  | <i>tar</i>     | putative Methyl-accepting chemotaxis protein                                                  | 2,25 | 0,0E+00 |
| <b>vc2264</b>  | <i>groEL-1</i> | chaperonin                                                                                    | 2,24 | 0,0E+00 |
| <b>vc0734</b>  | <i>aceB</i>    | Malate synthase A                                                                             | 2,24 | 1,4E-06 |
| <b>vc2507</b>  |                | PhoH family protein                                                                           | 2,23 | 0,0E+00 |
| <b>vc1344</b>  | <i>hppD</i>    | 4-hydroxyphenylpyruvate dioxygenase                                                           | 2,22 | 6,9E-15 |
| <b>vca0219</b> | <i>hlyA</i>    | Hemolysin                                                                                     | 2,20 | 5,7E-14 |
| <b>vca0159</b> |                | putative Universal stress protein family 1                                                    | 2,17 | 2,9E-15 |
| <b>vca0987</b> | <i>ppsA</i>    | phosphoenolpyruvate synthase                                                                  | 2,15 | 2,6E-09 |

| <i>vca0359</i> | <i>parE2</i> | Plasmid stabilization system ParE protein (toxin of TA system ParD-ParE)           | 2,14                         | 9,4E-10 |
|----------------|--------------|------------------------------------------------------------------------------------|------------------------------|---------|
| <i>vca0004</i> |              | conserved hypothetical protein                                                     | 2,14                         | 0,0E+00 |
| <i>vc1222</i>  | <i>ihfA</i>  | integration host factor subunit $\alpha$                                           | 2,13                         | 0,0E+00 |
| <i>vc2758</i>  | <i>fadB</i>  | fatty acid oxidation complex subunit alpha FadB                                    | 2,10                         | 6,1E-10 |
| <i>vc2704</i>  |              | conserved hypothetical protein                                                     | 2,10                         | 8,9E-09 |
| <i>vc1962</i>  | <i>nlpE</i>  | copper resistance protein NlpE N-terminal domain-containing protein                | 2,08                         | 3,9E-09 |
| <i>vca0278</i> | <i>glyA</i>  | serine hydroxymethyltransferase                                                    | 2,04                         | 0,0E+00 |
| <i>vca0280</i> | <i>gcvT</i>  | glycine cleavage system aminomethyltransferase                                     | 2,04                         | 4,4E-16 |
| <i>vc0976</i>  | <i>qmcA</i>  | putative Membrane protease subunits, stomatin/prohibitin homolog qmcA              | 2,03                         | 6,5E-06 |
| <i>vc1539a</i> |              | hypothetical protein                                                               | 2,02                         | 6,9E-10 |
| <i>vc0666</i>  |              | conserved hypothetical protein                                                     | 2,02                         | 1,8E-09 |
| <i>vc2144</i>  | <i>flaF</i>  | Polar flagellin F                                                                  | 2,01                         | 3,0E-13 |
|                |              |                                                                                    |                              |         |
| DOWNREGULATED  |              |                                                                                    |                              |         |
| Locus          | Name         | Annotation                                                                         | Fold change $\Delta vchM/WT$ | p-value |
| <i>vca0198</i> | <i>vchM</i>  | Cytosine-specific DNA methyltransferase                                            | -12,22                       | 1,4E-24 |
| <i>vca0933</i> | <i>cspE</i>  | transcription antiterminator and regulator of RNA stability                        | -8,41                        | 1,0E-07 |
| <i>vca0017</i> | <i>hcp</i>   | Haemolysin co-regulated protein (putative Type VI secretion system effector, Hcp1) | -3,20                        | 1,3E-10 |
| <i>vc2383</i>  | <i>ilvY</i>  | putative Transcriptional regulator, LysR family                                    | -3,14                        | 5,9E-27 |
| <i>vca0804</i> | <i>deaD</i>  | Cold-shock DEAD box protein A                                                      | -3,12                        | 6,5E-49 |
| <i>vca0874</i> |              | conserved hypothetical protein                                                     | -3,10                        | 1,1E-05 |
| <i>vc1704</i>  | <i>metE</i>  | 5-methyltetrahydropteroyltriglutamate-homocysteine methyltransferase               | -3,02                        | 7,6E-21 |
| <i>vc0768</i>  | <i>guaA</i>  | GMP synthetase                                                                     | -2,91                        | 2,7E-72 |
| <i>vca0680</i> | <i>napC</i>  | Cytochrome c-type protein napC                                                     | -2,87                        | 2,4E-07 |
| <i>vca0679</i> | <i>napB</i>  | Diheme cytochrome c napB                                                           | -2,82                        | 2,1E-06 |
| <i>vca0935</i> |              | hypothetical protein                                                               | -2,76                        | 1,2E-10 |
| <i>vc1261</i>  |              | putative Sugar efflux transporter B                                                | -2,63                        | 3,9E-07 |
| <i>vc0069</i>  | <i>mdtL</i>  | putative FLORFENICOL EXPORTER                                                      | -2,53                        | 8,1E-14 |
| <i>vca1002</i> |              | AzIC family ABC transporter permease                                               | -2,49                        | 2,0E-08 |
| <i>vc1415</i>  | <i>hcp</i>   | type VI secretion system secreted protein Hcp                                      | -2,48                        | 1,0E-06 |
| <i>vc0433</i>  | <i>arcD</i>  | Arginine/ornithine antiporter                                                      | -2,48                        | 1,9E-06 |

|                |             |                                                                                  |       |         |
|----------------|-------------|----------------------------------------------------------------------------------|-------|---------|
| <b>vc1393</b>  | <i>sugE</i> | Quaternary ammonium compound-resistance protein sugE                             | -2,43 | 3,4E-22 |
| <b>vc1035</b>  |             | conserved hypothetical protein                                                   | -2,40 | 6,3E-06 |
| <b>vc1608</b>  |             | ABC transporter permease                                                         | -2,38 | 2,8E-11 |
| <b>vca0250</b> |             | Alpha-amylase                                                                    | -2,37 | 7,2E-08 |
| <b>vc0767</b>  | <i>guaB</i> | inositol-5-monophosphate dehydrogenase                                           | -2,31 | 3,0E-22 |
| <b>vc1239</b>  | <i>cobU</i> | cobinamide-P guanylyltransferase / cobinamide kinase                             | -2,28 | 1,2E-09 |
| <b>vc0290</b>  | <i>fis</i>  | DNA-binding protein fis                                                          | -2,27 | 1,4E-04 |
| <b>vc2227</b>  | <i>purN</i> | phosphoribosylglycinamide formyltransferase 1                                    | -2,25 | 2,6E-10 |
| <b>vc2384</b>  |             | TSUP family transporter                                                          | -2,24 | 8,1E-16 |
| <b>vca1003</b> |             | AzID domain-containing protein                                                   | -2,23 | 1,5E-11 |
| <b>vca0678</b> | <i>napA</i> | Periplasmic nitrate reductase                                                    | -2,22 | 2,6E-10 |
| <b>vca1031</b> |             | Methyl-accepting chemotaxis protein                                              | -2,21 | 7,0E-11 |
| <b>vc1843</b>  | <i>cydB</i> | Cytochrome d ubiquinol oxidase subunit 2                                         | -2,21 | 5,9E-13 |
| <b>vc0191</b>  | <i>rhtC</i> | putative Lysine/Homoserine/Threonine exporter protein                            | -2,20 | 2,6E-10 |
| <b>vc1609</b>  |             | ABC transporter permease                                                         | -2,19 | 2,2E-10 |
| <b>vc0005</b>  | <i>yidD</i> | membrane protein insertion efficiency factor                                     | -2,16 | 4,9E-10 |
| <b>vc0291</b>  | <i>dusB</i> | tRNA-dihydrouridine synthase B                                                   | -2,16 | 3,8E-16 |
| <b>vc1855</b>  | <i>dinG</i> | <u>ATP-dependent DNA helicase DinG</u>                                           | -2,15 | 7,7E-07 |
| <b>vc2382</b>  |             | conserved hypothetical protein                                                   | -2,15 | 3,1E-07 |
| <b>vc1842</b>  | <i>cydX</i> | cytochrome bd-I oxidase subunit CydX                                             | -2,14 | 1,8E-06 |
| <b>vc1629</b>  |             | ABC transporter permease                                                         | -2,13 | 3,0E-06 |
| <b>vc0706</b>  | <i>raiA</i> | Ribosome-associated inhibitor A                                                  | -2,13 | 1,1E-08 |
| <b>vc2047</b>  |             | SDR family oxidoreductase                                                        | -2,11 | 3,4E-23 |
| <b>vc1174</b>  | <i>trpE</i> | Anthranilate synthase component 1                                                | -2,09 | 9,9E-18 |
| <b>vc1240</b>  |             | histidine phosphatase family protein                                             | -2,09 | 1,5E-06 |
| <b>vc0940</b>  |             | conserved hypothetical protein                                                   | -2,07 | 1,3E-07 |
| <b>vc1487</b>  |             | glutaredoxin family protein                                                      | -2,06 | 8,0E-06 |
| <b>vca0214</b> | <i>emrD</i> | multidrug efflux pump EmrD                                                       | -2,05 | 6,0E-12 |
| <b>vca0269</b> |             | aspartate aminotransferase family protein                                        | -2,04 | 2,2E-13 |
| <b>vc2647</b>  | <i>aphA</i> | Transcriptional regulator PadR family                                            | -2,04 | 9,6E-56 |
| <b>vc2226</b>  | <i>purM</i> | Phosphoribosylformylglycinamide cyclo-ligase                                     | -2,02 | 9,3E-10 |
| <b>vc0651</b>  |             | putative Peptidase U32                                                           | -2,02 | 2,4E-13 |
| <b>vc1630</b>  |             | putative SalX, ABC-type antimicrobial peptide transport system, ATPase component | -2,02 | 2,5E-19 |
| <b>vca0684</b> |             | MFS transporter                                                                  | -2,02 | 9,3E-14 |

|               |             |                                                 |       |         |
|---------------|-------------|-------------------------------------------------|-------|---------|
| <b>vc0717</b> | <i>yegQ</i> | tRNA 5-hydroxyuridine modification protein YegQ | -2,01 | 4,2E-09 |
| <b>vc1856</b> |             | TSUP family transporter                         | -2,00 | 7,2E-10 |
| <b>vc0987</b> | <i>hemH</i> | ferrochelatase                                  | -2,00 | 1,9E-17 |
