# Supplementary material for: Deficiency in cytosine DNA methylation leads to high chaperonin expression and tolerance to aminoglycosides in Vibrio cholerae
Source: PubMed Central journal article supplement (PMC8559950; doi:10.1371/journal.pgen.1009748), 2021-10-20
Supplement: pgen.1009748.s002.pdf [file pgen.1009748.s002.pdf]

**Table S2. Strains, plasmids and primers used in this study**

| Strain                                           | Lab Strain number | Source/Construction                                                                                                                                                                                                                                                                                                   |
|--------------------------------------------------|-------------------|-----------------------------------------------------------------------------------------------------------------------------------------------------------------------------------------------------------------------------------------------------------------------------------------------------------------------|
| <i>Vibrio cholerae</i>                           |                   |                                                                                                                                                                                                                                                                                                                       |
| N16961 hapR+<br>WT<br>strain                     | F606              | Gift from Melanie Blokesch                                                                                                                                                                                                                                                                                            |
| $\Delta vchM$<br>(vca0198)                       | H507              | PCR amplification of 500bp up and down genomic regions of VCA0198 using primers ZIP136/137 and ZIP138/139. PCR amplification of aadA7 conferring spectinomycin resistance on pAM34 using ZB47/48. PCR assembly of the VCA0198::spec fragment using ZIP136/139 and allelic exchange by natural transformation in F606. |
| $\Delta lacZ$                                    | K329              | Lab collection                                                                                                                                                                                                                                                                                                        |
| $\Delta groESL-2$<br>(vca0819-0820)              | M958              | allelic exchange by integration and excision of conjugative suicide plasmid pMP7 (pM340) replacing the gene with frt::kan::frt                                                                                                                                                                                        |
| $\Delta vchM$<br>$\Delta groESL-2$               | N330              | PCR amplification of 500bp up and down genomic regions of VCA0198 using primers ZIP136/137 and ZIP138/139. PCR amplification of aadA7 conferring spectinomycin resistance on pAM34 using ZB47/48. PCR assembly of the VCA0198::spec fragment using ZIP136/139 and allelic exchange by natural transformation in M958  |
| WT – VchM site<br>#1 mutated<br>(mut #1)         | L900              | allelic exchange by integration and excision of conjugative suicide plasmid pMP7 (pL442)                                                                                                                                                                                                                              |
| WT – VchM<br>sites #1-4<br>mutated (mut<br>#1-4) | Q827              | allelic exchange by integration and excision of conjugative suicide plasmid pMP7 containing the <i>groESL-2</i> region with sites #1-4 mutated (pQ824) in M958 strain.                                                                                                                                                |
| $\Delta vchM$ mut #1-<br>4                       | Q828              | allelic exchange by integration and excision of conjugative suicide plasmid pMP7 containing the <i>groESL-2</i> region with sites #1-4 mutated (pQ824) in N330                                                                                                                                                        |
|                                                  |                   |                                                                                                                                                                                                                                                                                                                       |

| Plasmids                                                                   |      |                                                                                                                                                                                                                                                                                                                                                                                                                               |
|----------------------------------------------------------------------------|------|-------------------------------------------------------------------------------------------------------------------------------------------------------------------------------------------------------------------------------------------------------------------------------------------------------------------------------------------------------------------------------------------------------------------------------|
| pMP7-<br><i>Δvca0819-0820::kan</i>                                         | M340 | gibson assembly using primers MV450/451 for the amplification of pMP7 vector, primers “vca0819-8205” and “vca0819-8206” for up and down regions of the gene, and primers MV268/269 on pKD4 plasmid for the resistance gene (frrt::kan::frrt).                                                                                                                                                                                 |
| pMP7- C->T point mutation of VchM site #1 in 5' UTR region of vca0819-0820 | L442 | Amplification of 500bp upstream of <i>vca0819</i> with primers 5923/5922; Amplification of 500bp downstream of <i>vca0819</i> with 5924/5921; PCR assembly of the two fragments with primers 5923/5924. Note: Primers 5922 and 5921 contain a mismatch to give origin to a C->T point mutation in VchM site #1. The fragment was then cloned in a pTOPO vector and sub cloned into pMP7 using <i>EcoRI</i> restriction sites. |
| pMP7- sites #1-4 mutated in vca0819-0820 region                            | Q824 | A <i>groESL-2</i> fragment with mutations in VchM sites #2-4 was synthesized and cloned in a pTOPO vector. This fragment was then PCR assembled to the 5' UTR region containing site #1 mutated (from strain L900), which originated a final fragment containing the #1-4 mutated sites. This fragment was then cloned in pTOPO and sub cloned into pMP7 using <i>EcoRI</i> restriction sites.                                |
| pSC101-<br><i>groESL-1</i>                                                 | O849 | Amplification of <i>vc2664-2665</i> from <i>V. cholerae</i> gDNA with primers AFC046/AFC047. Primer AFC046 contains a P <sub>trc</sub> promoter. Fragment cloned in pSC101 low copy plasmid (carbenicillin resistant) using <i>EcoRI</i> restriction sites                                                                                                                                                                    |
| pSC101-<br><i>groESL-2</i>                                                 | N752 | Amplification of <i>vca0819-0820</i> from <i>V. cholerae</i> gDNA with primers AFC029/AFC030. Primer AFC029 contains a P <sub>trc</sub> promoter. Fragment cloned in pSC101 low copy plasmid (carbenicillin resistant) using <i>EcoRI</i> restriction sites                                                                                                                                                                   |
| pSC101- <i>vchM</i>                                                        | Q826 | Amplification of <i>vca0198 (vchM)</i> with its own promoter from <i>V. cholerae</i> gDNA with primers 5990/5911. Cloning in pTOPO vector and sub cloning in pSC101 low copy plasmid (carbenicillin resistant) using <i>BamHI</i> and <i>PstI</i> restriction sites                                                                                                                                                           |
| Primers                                                                    |      | Sequence 5'-3'                                                                                                                                                                                                                                                                                                                                                                                                                |
| ZIP136                                                                     |      | GCCGCCGAAGGAAAAACCGTACTATTGC                                                                                                                                                                                                                                                                                                                                                                                                  |
| ZIP137                                                                     |      | GCGAGCATCGTTTGTTCGCCAGCTTCTGTATGGAACGGGTAACTGTATCACCATACTACCTCATGG                                                                                                                                                                                                                                                                                                                                                            |
| ZIP138                                                                     |      | CGTGAAAGGCGAGATCACCAAGGTAGTCGGCAAATAATGTCTACATGCTTACAGCGTAGTCGC                                                                                                                                                                                                                                                                                                                                                               |
| ZIP139                                                                     |      | TTAATTTCTCGAGTTTCAGATGC                                                                                                                                                                                                                                                                                                                                                                                                       |

|              |  |                                                                                                                          |
|--------------|--|--------------------------------------------------------------------------------------------------------------------------|
| ZB47         |  | CCCGTTCATACAGAAGCTGGGCGAACAAACGATGCTCGC                                                                                  |
| ZB48         |  | GACATTATTTGCCGACTACCTTGGTGATCTCGCCTTTCACG                                                                                |
| vca0819-8205 |  | CTATTATTTAAACTCTTCCGTTTTGCCTT                                                                                            |
| vca0819-8206 |  | TACGTAGAATGTATCAGACTCGCCCAAGGA                                                                                           |
| 5921         |  | AAACAATCCTA <u>T</u> CGGCCTTTTATC                                                                                        |
| 5922         |  | GATAAAAGGCCG <u>A</u> TAGGATTGTTT                                                                                        |
| 5923         |  | ACTTTGATGGTACGCGCGATG                                                                                                    |
| 5924         |  | GATTTATTGAGCACAAACATGGCG                                                                                                 |
| AFC029       |  | GTAAGTGAATTCTTGACAATTAATCATCCGGCTCGTATAATGTGTG<br>GAATTGTGAGCGGATAACAATTTACACAGGAAACAGCGCCGCAT<br>GAATATTCGTCTTTACATG    |
| AFC030       |  | GTAAGTGAATTCATTACGCCGAGACTCTTTGTC                                                                                        |
| AFC046       |  | GTAAGTGAATTCTTGACAATTAATCATCCGGCTCGTATAATGTGTG<br>GAATTGTGAGCGGATAACAATTTACACAGGAAACAGCGCCGCAT<br>GAATATTCGTCCATTACATGAC |
| AFC047       |  | GTAAGTGAATTCCTGCTAAGGGGGATGATTACA                                                                                        |
| 5990         |  | GTTTTTGCTGCCGTCTGCTA                                                                                                     |
| 5911         |  | GTAGTCGACCCTTTTTACAACTTTCTAGA                                                                                            |
